# Supplementary material for: Catecholamine exposure and the gut microbiota in obstructive sleep apnea
Source: PeerJ. 2025 Apr 14;13:e19203. doi: 10.7717/peerj.19203 (PMC12005174; doi:10.7717/peerj.19203)
Supplement: Supplemental Information 7 — Calprotectin isolated from human fecal samples in subjects with obstructive sleep apnea and controls. [file peerj-13-19203-s007.xlsx]

## Sheet: Sheet5
Subject ID (.1 indicates first sample, .2 indicates second sample)	OSA Patient = 1; Control = 0	First collection = 1, Second collection = 2	No second collection 1= yes, 0 = no	Calprotectin Conc (ng/ml)
					Concentration ng/ml
	Patient status	Sample number	Single sample	runid	Plate1	Plate2	Average (ng/ml)
1.1	1	1	0	1	2.72528	3.23817	2.98173
1.2	1	2	0	2	2.39501	2.68758	2.5413
2.1	1	1	0	3	3.29003	3.86691	3.57847
2.2	1	2	0	4	2.81365	3.47178	3.14271
3.1	1	1	0	5	2.2336	2.31698	2.27529
6	1	1	1	6	3.17126	3.58706	3.37916
12	1	1	1	7	2.89129	3.30004	3.09567
17	1	1	1	8	3.18132	3.34781	3.26456
20.1	1	1	0	9	2.46413	2.62505	2.54459
20.2	1	2	0	10	2.14895	2.30395	2.22645
27	1	1	1	11	3.13036	3.58815	3.35925
34.1	1	1	0	12	2.39304	2.78333	2.58819
34.2	1	2	0	13	2.27056	2.66261	2.46659
35	1	1	1	14	2.45538	2.6561	2.55574
36.1	1	1	0	15	2.86964	3.21407	3.04185
36.2	1	2	0	16	3.22966	3.55949	3.39457
37	1	1	1	17	2.50984	2.60074	2.55529
38	1	1	1	18	2.62686	3.20278	2.91482
39	1	1	1	19	2.61702	3.09075	2.85388
41.1	1	1	0	20	2.67345	2.96917	2.82131
42	1	1	1	21	3.01662	3.58945	3.30304
43.1	1	1	0	22	2.6262	3.05211	2.83915
43.2	1	2	0	23	2.82677	3.297	3.06189
44	1	1	1	24	3.90748	4.33825	4.12287
46.1	1	1	0	25	2.9381	3.34195	3.14002
46.2	1	2	0	26	2.54506	3.18802	2.86654
47	1	1	1	27	2.60871	2.98697	2.79784
48	1	1	1	28	2.54593	2.80786	2.6769
49	1	1	1	29	2.70035	3.03539	2.86787
50	1	1	1	30	2.37664	2.73969	2.55816
1225.1	0	1	0	31	3.07393	3.75076	3.41234
1225.2	0	2	0	32	3.05468	4.00651	3.5306
2284.1	0	1	0	33	2.66864	3.03561	2.85212
2284.2	0	2	0	34	2.35521	2.76921	2.56221
8619	0	1	1	35	2.74781	2.86843	2.80812
2485	0	1	1	36	2.58333	2.86952	2.72643
1.1	0	1	0	37	2.86155	3.31372	3.08763
1.2	0	2	0	38	2.31671	2.59835	2.45753
2.1	0	1	0	39	3.3329	3.86192	3.59741
2.2	0	2	0	40	3.35258	3.93356	3.64307
3.1	0	1	0	41	2.99103	3.31698	3.15401
3.2	0	2	0	42	3.34799	4.0419	3.69494
4.1	0	1	0	43	2.52537	3.01303	2.7692
4.2	0	2	0	44	2.71194	3.16413	2.93804
6.1	0	1	0	45	2.41164	2.75337	2.5825
6.2	0	2	0	46	2.46019	2.78593	2.62306
7.1	0	1	0	47	2.41842	2.7614	2.58991
7.2	0	2	0	48	2.57896	3.05623	2.81759
8.1	0	1	0	49	2.68898	2.92531	2.80715
8.2	0	2	0	50	2.49366	2.67738	2.58552
9	0	1	1	51	2.69729	3.19909	2.94819
10.1	0	1	0	52	3.36592	3.9403	3.65311
10.2	0	2	0	53	3.24825	3.7703	3.50927
12.1	0	1	0	54	2.3878	2.77334	2.58057
12.2	0	2	0	55	2.69926	3.1155	2.90738
13	0	1	1	56	2.87511	3.19518	3.03514
14.1	0	1	0	57	2.6262	3.13157	2.87889
14.2	0	2	0	58	2.64458	3.20278	2.92368
16.1	0	1	0	59	2.57327	2.97503	2.77415
16.2	0	2	0	60	2.66885	3.19865	2.93375
19.1	0	1	0	61	2.09689	2.21537	2.15613
19.2	0	2	0	62	2.3657	2.7957	2.5807
20.1	0	1	0	63	2.48403	2.82805	2.65604
20.2	0	2	0	64	3.14348	3.39362	3.26855
21.1	0	1	0	65	2.32743	2.56882	2.44813
21.2	0	2	0	66	2.3143	2.67282	2.49356
22.1	0	1	0	67	2.35477	2.95571	2.65524
22.2	0	2	0	68	2.52581	3.16913	2.84747
23.1	0	1	0	69	2.34668	2.83999	2.59333
23.2	0	2	0	70	2.31562	2.92466	2.62014
3.2	1	2	0	71	1.97266	2.01628	1.99447
41.2	1	2	0	72	2.98513	3.39297	3.18905

## Sheet: Sheet1
##BLOCKS= 1
Plate:	Plate#1	1.3	PlateFormat	Endpoint	Absorbance	Raw	FALSE	1						1	450	1	12	96	1	8	None
	Temperature(¡C)	1	2	3	4	5	6	7	8	9	10	11	12
	25.1	-0.00385	0.00385	0.06125	0.02535	0.00605	0.00255	0.02295	0.01675	0.03405	0.02365	0.04615	0.04815
		0.27765	0.22935	0.06555	0.02615	0.00655	0.00175	0.01425	0.02105	0.03385	0.03325	0.06575	0.06045
		0.46925	0.41465	0.00935	0.00405	0.32585	0.18405	0.00765	0.01325	0.03485	0.03845	0.09695	0.05845
		0.87475	0.73465	0.00495	-0.00105	0.33115	0.17495	0.00635	0.00705	0.02985	0.03535	0.07715	0.05115
		1.46915	1.27155	0.23965	0.11495	0.02815	0.01615	0.21345	0.11365	0.04595	0.03695	0.06165	0.05235
		2.30745	1.91105	0.22925	0.12535	0.02245	0.00615	0.20365	0.11075	0.03445	0.04055	0.05165	0.03975
		2.92235	2.76665	0.06995	0.03525	0.01385	0.01865	0.02275	0.01115	0.01875	0.01235	0.04345	0.04445
		3.62215	3.39015	0.08195	0.04445	0.01375	0.00865	0.00825	0.03095	0.02565	0.01965	0.16445	0.04805
~End
Instrument type: Instrument serial number:
Conc	Abs
0	0		0.0634	0.02575			0.08705	0.0548
1.6	0.2535						1.9213	1.8584
3.1	0.44195		1.87517	1.80174			1537.04	2230.08
6.3	0.8047		1500.14	2162.08				1.45089
12.5	1.37035			1.44126
25	2.10925
50	2.8445		0.3285	0.1795
100	3.50615		2.39224	2.10162
			1913.79	2521.94
				1.31777

## Sheet: Sheet2
##BLOCKS= 1
Plate:	Plate#1	1.3	PlateFormat	Endpoint	Absorbance	Raw	FALSE	1						1	450	1	12	96	1	8	None
	Temperature(¡C)	1	2	3	4	5	6	7	8	9	10	11	12
	25.4	0.00345	-0.00345	0.14905	0.07165	0.06235	0.02375	0.01865	0.00995	0.01355	0.00585	0.04205	0.02835
		0.22245	0.18635	0.11115	0.05925	0.05535	0.01705	0.02075	0.00415	0.00945	0.00255	0.03475	0.01285
		0.35035	0.30505	-0.00385	0.00555	0.06255	0.01915	-0.00075	-0.00325	0.00675	-0.00035	-0.00345	-0.00555
		0.63195	0.54205	-0.00405	0.00665	0.05305	0.01645	-0.00075	-0.00415	0.00245	0.01195	0.00045	-0.00485
		1.23095	1.01825	0.00845	0.01335	0.00255	-0.00315	0.05775	0.04555	0.01035	0.00125	0.10985	0.05025
		1.88335	1.51825	0.01775	0.00745	0.00295	-0.00375	0.04935	0.03315	0.00895	-0.00155	0.11515	0.04415
		2.74825	2.67235	0.14975	0.06295	0.01625	0.01005	0.23005	0.13125	0.01375	-0.00065	0.20835	0.13175
		3.53535	3.23575	0.21575	0.09285	0.01625	0.00635	0.32145	0.16015	0.01645	0.00445	0.21135	0.19675
~End
Instrument type: Instrument serial number:

## Sheet: Sheet3
##BLOCKS= 1
Plate:	Plate#1	1.3	PlateFormat	Endpoint	Absorbance	Raw	FALSE	1						1	450	1	12	96	1	8	None
	Temperature(¡C)	1	2	3	4	5	6	7	8	9	10	11	12
	25.3	0.0006	-0.0006	0.4436	0.3242	0.3451	0.5409	0.4177	0.5651	0.427	0.3983	0.2617	-0.068
		0.2453	0.1991	0.2926	0.1801	0.3986	0.3612	0.2744	0.7283	0.3377	0.4067	0.2557	-0.0681
		0.5002	0.3203	0.7018	0.6288	0.3941	0.3903	0.4539	0.3522	0.4308	0.3741	0.2742	-0.0679
		0.7766	0.6264	0.484	0.2917	0.4199	0.3616	0.3787	0.4375	0.7365	0.4178	0.3524	-0.0681
		1.0558	1.2131	0.2188	0.2357	0.5768	0.4322	0.5059	0.3002	0.6827	0.1563	0.2705	-0.068
		2.1308	1.6553	0.6475	0.3202	0.3983	0.2842	0.2568	0.3224	0.2893	0.2792	0.2563	-0.0683
		2.6248	2.4832	0.5195	0.5096	0.49	0.603	0.7214	0.3033	0.4317	0.3333	0.0995	-0.0681
		3.3046	2.9414	0.6521	0.6742	0.9841	0.5942	0.7304	0.3767	0.5121	0.6348	0.5624	-0.0683
~End
Instrument type: Instrument serial number:
Plate 1 Std.curve			plate 2 Std.curve
Conc	Abs		Conc	Abs
0	0		0	0
1.6	0.2222		1.6	0.36315
3.1	0.41025		3.1	0.426
6.3	0.7015		6.3	0.76215
12.5	1.13445		12.5	1.26465
25	1.89305		25	1.86445
50	2.554		50	2.55735
100	3.123		100	3.27185
		Plate1	Plate2
Sample #	Abs	Conc (ng/ml)	Conc (ng/ml)	Avg Conc
1	0.4436	2.72528	3.23817	2.98173
2	0.2926	2.39501	2.68758	2.5413
3	0.7018	3.29003	3.86691	3.57847
4	0.484	2.81365	3.47178	3.14271
5	0.2188	2.2336	2.31698	2.27529
6	0.6475	3.17126	3.58706	3.37916
7	0.5195	2.89129	3.30004	3.09567
8	0.6521	3.18132	3.34781	3.26456
9	0.3242	2.46413	2.62505	2.54459
10	0.1801	2.14895	2.30395	2.22645
11	0.6288	3.13036	3.58815	3.35925
12	0.2917	2.39304	2.78333	2.58819
13	0.2357	2.27056	2.66261	2.46659
14	0.3202	2.45538	2.6561	2.55574
15	0.5096	2.86964	3.21407	3.04185
16	0.6742	3.22966	3.55949	3.39457
17	0.3451	2.50984	2.60074	2.55529
18	0.3986	2.62686	3.20278	2.91482
19	0.3941	2.61702	3.09075	2.85388
20	0.4199	2.67345	2.96917	2.82131
21	0.5768	3.01662	3.58945	3.30304
22	0.3983	2.6262	3.05211	2.83915
23	0.49	2.82677	3.297	3.06189
24	0.9841	3.90748	4.33825	4.12287
25	0.5409	2.9381	3.34195	3.14002
26	0.3612	2.54506	3.18802	2.86654
27	0.3903	2.60871	2.98697	2.79784
28	0.3616	2.54593	2.80786	2.6769
29	0.4322	2.70035	3.03539	2.86787
30	0.2842	2.37664	2.73969	2.55816
31	0.603	3.07393	3.75076	3.41234
32	0.5942	3.05468	4.00651	3.5306
33	0.4177	2.66864	3.03561	2.85212
34	0.2744	2.35521	2.76921	2.56221
35	0.4539	2.74781	2.86843	2.80812
36	0.3787	2.58333	2.86952	2.72643
37	0.5059	2.86155	3.31372	3.08763
38	0.2568	2.31671	2.59835	2.45753
39	0.7214	3.3329	3.86192	3.59741
40	0.7304	3.35258	3.93356	3.64307
41	0.5651	2.99103	3.31698	3.15401
42	0.7283	3.34799	4.0419	3.69494
43	0.3522	2.52537	3.01303	2.7692
44	0.4375	2.71194	3.16413	2.93804
45	0.3002	2.41164	2.75337	2.5825
46	0.3224	2.46019	2.78593	2.62306
47	0.3033	2.41842	2.7614	2.58991
48	0.3767	2.57896	3.05623	2.81759
49	0.427	2.68898	2.92531	2.80715
50	0.3377	2.49366	2.67738	2.58552
51	0.4308	2.69729	3.19909	2.94819
52	0.7365	3.36592	3.9403	3.65311
53	0.6827	3.24825	3.7703	3.50927
54	0.2893	2.3878	2.77334	2.58057
55	0.4317	2.69926	3.1155	2.90738
56	0.5121	2.87511	3.19518	3.03514
57	0.3983	2.6262	3.13157	2.87889
58	0.4067	2.64458	3.20278	2.92368
59	0.3741	2.57327	2.97503	2.77415
60	0.4178	2.66885	3.19865	2.93375
61	0.1563	2.09689	2.21537	2.15613
62	0.2792	2.3657	2.7957	2.5807
63	0.3333	2.48403	2.82805	2.65604
64	0.6348	3.14348	3.39362	3.26855
65	0.2617	2.32743	2.56882	2.44813
66	0.2557	2.3143	2.67282	2.49356
67	0.2742	2.35477	2.95571	2.65524
68	0.3524	2.52581	3.16913	2.84747
69	0.2705	2.34668	2.83999	2.59333
70	0.2563	2.31562	2.92466	2.62014
71	0.0995	1.97266	2.01628	1.99447
72	0.5624	2.98513	3.39297	3.18905

## Sheet: Sheet4
##BLOCKS= 1
Plate:	Plate#1	1.3	PlateFormat	Endpoint	Absorbance	Raw	FALSE	1						1	450	1	12	96	1	8	None
	Temperature(¡C)	1	2	3	4	5	6	7	8	9	10	11	12
	25.9	0.0139	-0.0139	0.7324	0.45	0.4388	0.7802	0.6391	0.7687	0.5883	0.6833	0.4241	-0.0909
		0.2938	0.4325	0.4788	0.3021	0.7161	0.7093	0.5164	1.1026	0.4741	0.7161	0.472	-0.0908
		0.4595	0.3925	1.022	0.8936	0.6645	0.6167	0.5621	0.6287	0.7144	0.6112	0.6023	-0.0906
		0.7986	0.7257	0.84	0.5229	0.6085	0.5342	0.5626	0.6983	1.0558	0.7142	0.7006	-0.0907
		1.3605	1.1688	0.3081	0.4673	0.8942	0.639	0.7672	0.5091	0.9775	0.2613	0.549	-0.0908
		1.9657	1.7632	0.8931	0.4643	0.6467	0.5028	0.4377	0.5241	0.5183	0.5286	0.588	-0.0908
		2.6162	2.4985	0.7609	0.7213	0.7595	0.9685	1.0197	0.5128	0.6759	0.5435	0.1696	-0.0908
		3.363	3.1807	0.7829	0.8804	1.2391	1.0863	1.0527	0.6486	0.7126	0.804	0.8037	-0.0912
~End
Instrument type: Instrument serial number:
Conc	Abs
0	0
1.6	0.36315
3.1	0.426
6.3	0.76215
12.5	1.26465
25	1.86445
50	2.55735
100	3.27185
Sample #	Abs	Conc (ng/ml)
1	0.7324	3.23817
2	0.4788	2.68758
3	1.022	3.86691
4	0.84	3.47178
5	0.3081	2.31698
6	0.8931	3.58706
7	0.7609	3.30004
8	0.7829	3.34781
9	0.45	2.62505
10	0.3021	2.30395
11	0.8936	3.58815
12	0.5229	2.78333
13	0.4673	2.66261
14	0.4643	2.6561
15	0.7213	3.21407
16	0.8804	3.55949
17	0.4388	2.60074
18	0.7161	3.20278
19	0.6645	3.09075
20	0.6085	2.96917
21	0.8942	3.58945
22	0.6467	3.05211
23	0.7595	3.297
24	1.2391	4.33825
25	0.7802	3.34195
26	0.7093	3.18802
27	0.6167	2.98697
28	0.5342	2.80786
29	0.639	3.03539
30	0.5028	2.73969
31	0.9685	3.75076
32	1.0863	4.00651
33	0.6391	3.03561
34	0.5164	2.76921
35	0.5621	2.86843
36	0.5626	2.86952
37	0.7672	3.31372
38	0.4377	2.59835
39	1.0197	3.86192
40	1.0527	3.93356
41	0.7687	3.31698
42	1.1026	4.0419
43	0.6287	3.01303
44	0.6983	3.16413
45	0.5091	2.75337
46	0.5241	2.78593
47	0.5128	2.7614
48	0.6486	3.05623
49	0.5883	2.92531
50	0.4741	2.67738
51	0.7144	3.19909
52	1.0558	3.9403
53	0.9775	3.7703
54	0.5183	2.77334
55	0.6759	3.1155
56	0.7126	3.19518
57	0.6833	3.13157
58	0.7161	3.20278
59	0.6112	2.97503
60	0.7142	3.19865
61	0.2613	2.21537
62	0.5286	2.7957
63	0.5435	2.82805
64	0.804	3.39362
65	0.4241	2.56882
66	0.472	2.67282
67	0.6023	2.95571
68	0.7006	3.16913
69	0.549	2.83999
70	0.588	2.92466
71	0.1696	2.01628
72	0.8037	3.39297
