# Supplementary material for: Catecholamine exposure and the gut microbiota in obstructive sleep apnea
Source: PeerJ. 2025 Apr 14;13:e19203. doi: 10.7717/peerj.19203 (PMC12005174; doi:10.7717/peerj.19203)
Supplement: Supplemental Information 8 [file peerj-13-19203-s008.xlsx]

## Sheet: Sheet1
									Urine Norepinephrine, 24 hour total	Urine Norepinephrine, Corrected for creatinine
Subject Number	Sample ID	Sex F=0, M=1	BMI	Age	OSA Patient 0=no, 1=yes	Treated with CPAP 0=no, 1=yes	Collection Number, 1=first, 2=second	AHI (Apnea Hypopnea Index)	NE Ug/day	NE Ug/g
1	1	0	33	52	1	0	1	50	30	30
1	1.1	0	33	52	1	1	2		41	26
2	2	1	55	41	1	0	1	117	130	46
2	2.1	1	55	41	1	1	2		83	38
3	3	1	78	45	1	0	1	133	112	54
3	3.1	1	78	45	1	1	2		52	50
6	6	1	44	34	1	0	1	76	32	26
12	12	0	39	49	1	0	1	38	46	36
17	17	0	81	36	1	0	1	57	129	46
17	17.1	0	81	36	1	1	2		52	28
20	20	1	35	51	1	0	1	110	81	41
20	20.1	1	35	51	1	1	2		87	38
24	24	0	56	60	1	0	1	73	19	59
24	24.1	0	56	60	1	1	2		41	49
27	27	0	43	46	1	0	1	39	135	70
27	27.1	0	43	46	1	1	2		58	33
34	34	1	29	62	1	0	1	31	34	23
34	34.1	1	29	62	1	1	2		54	30
35	35	1	32	37	1	0	1	19	124	41
36	36	0	42	61	1	0	1	91	200	67
36	36.1	0	42	61	1	1	2		62	41
37	37	1	32	59	1	0	1	64	60	28
38	38	0	46	38	1	0	1	78	63	31
39	39	0	44	52	1	0	1	31	46	24
41	41	0	31	65	1	0	1	28	57	48
41	41.1	0	31	65	1	1	2		78	83
42	42	0	46	54	1	0	1	119	78	61
43	43	1	36	33	1	0	1	44	18	28
43	43.1	1	36	33	1	1	2		20	24
44	44	0	48	48	1	0	1	21	78	75
46	46	1	46	46	1	0	1	98	34	21
46	46.1	1	46	46	1	1	2		26	15
47	47	0	35	49	1	0	1	111	183	77
48	48	0	48	46	1	0	1	47	76	59
49	49	1	33	53	1	0	1	23	64	35
50	50	0	44	30	1	0	1	30	87	35
50	50.1	0	44	30	1	1	2		35	26
100	101	1	34	28	0		1		71	36
100	101.1	1	34	28	0		2		54	30
102	102	0	32	27	0		1		19	14
102	102.1	0	32	27	0		2		19	18
103	103	0	34	62	0		1		24	26
103	103.1	0	34	62	0		2		35	29
104	104	0	55	30	0		1		40	25
104	104.1	0	55	30	0		2		50	27
106	106	0	41	67	0		1		115	79
106	106.1	0	41	67	0		2		88	72
107	107	0	35	41	0		1		60	30
107	107.1	0	35	41	0		2		45	25
108	108	1	29	40	0		1		55	25
108	108.1	1	29	40	0		2		49	28
109	109	0	35	54	0		1		14	15
110	110	1	29	35	0		1		49	17
110	110.1	1	29	35	0		2		50	19
111	111	1	30	31	0		1
112	112	0	30	47	0		1		35	31
112	112.1	0	30	47	0		2		47	47
113	113	0	32	43	0		1		65	40
114	114	1	27	63	0		1		35	21
114	114.1	1	27	63	0		2		47	29
116	116	1	30	44	0		1		122	49
116	116.1	1	30	44	0		2		45	45
119	119	0	34	55	0		1		38	28
119	119.1	0	34	55	0		2		58	30
120	120	1	35	46	0		1		63	27
120	120.1	1	35	46	0		2		105	37
121	121	0	33	45	0		1		67	31
121	121.1	0	33	45	0		2		67	38
122	122	1	30	42	0		1		53	20
122	122.1	1	30	42	0		2		46	18
123	123	0	44	46	0		1		47	28
123	123.1	0	44	46	0		2		64	29
1225	1225	0	34	45	0		1		18	19
1225	1225.1	0	34	45	0		2		15	18
2284	2284	0	48	45	0		1		82	44
2284	2284.1	0	48	45	0		2		88	44
2485	2485	0	52	27	0		1		221	21
8619	8619	0	31	55	0		1		156	24
